# Supplementary material for: Rally Without a Surge? Sequential Crises and Asymmetric Mobilization in Polarized Contexts
Source: Research Square preprint supplement (doi:10.21203/rs.3.rs-8523383/v1), 2026-02-02
Supplement: Supplementary file 1 [file 0b90c2b11485fbe441267ad5.docx]

# Online Appendix

## Open-ended coding

### ****A. Open-ended coding: scheme, procedure, and category definitions.****

Open-ended vote-justification responses were coded using a pre-specified scheme into 10 substantive categories: (1) WAR/Ukraine/security/peace; (2) Economy/inflation/prices/cost-of-living; (3) COVID/healthcare/vaccination; (4) Corruption/abuse/state capture; (5) Migration/identity/culture; (6) Leader competence/stability/experience; (7) “No alternative / opposition incompetence / disunity”; (8) Clientelism/material benefits (e.g., rezsi, transfers, benefits); (9) Ideology/values (left–right/lib–con); and (10) Negative partisanship (anti-X).

**Scope.** Although the coding scheme covers ten categories, the article’s statistical analysis focuses **ex ante** on two crisis categories aligned with the paper’s two exogenous shocks: WAR/Ukraine/security/peace and COVID-19/healthcare/vaccination.

**Pre-processing.** Prior to coding, responses were lightly cleaned to correct obvious language errors while preserving meaning.

**Hybrid three-coder procedure.** Coding used three independent coders: two algorithmic coders implemented with two different language-model systems and one manual coder applying the same codebook. Algorithmic coders received the same instruction to evaluate the full response (not just keywords), attend to negation, and use context when assigning categories. Final labels were assigned deterministically: unanimous agreement (3/3) was accepted; majority agreement (2/3) was accepted; and in cases of complete disagreement (three different labels), the manual code served as the tie-breaker. Given the linguistic complexity of Hungarian open-ended responses, algorithmic coding is treated as an auxiliary cross-check, and analysis relies on the final adjudicated labels anchored in manual coding.

**Category definitions (crisis categories used in the article).**

**WAR/Ukraine/security/peace** includes explicit or implicit references to the Russia–Ukraine war (e.g., “war,” “Ukraine,” “Russia”), security/peace considerations, sanctions, and closely related international conflict framing as a vote reason. Mentions that explicitly reject war as a motivation (e.g., “not because of the war”) are not coded as WAR.

**COVID/healthcare/vaccination** includes references to COVID-19, the pandemic, vaccination, restrictions/lockdowns, and health-care considerations linked to COVID-era governance. Mentions that explicitly negate COVID as motivation are not coded as COVID.

Full codebook definitions, additional category notes, and coding instructions are documented with the replication materials.

### B. Illustrative examples (original Hungarian responses)

To illustrate how categories were applied, we provide anonymized examples of original Hungarian responses. Examples are shown verbatim (with minor anonymization where needed). Category assignment follows the codebook and the decision rules described above.

**WAR/Ukraine/security/peace (explicit war/peace or non-involvement cues):**

- “Háború ellenes a Fidesz.” “Ne háborúzzunk!”“Maradjunk ki a háborúból!” “Nem háborúzzunk, elég volt régen!”

**COVID-19/healthcare/vaccination (explicit pandemic, vaccination, or health-care cues):**

- “Oltásellenesek.” “Oltás.” “Koronavírus.”

### Online tables

**Online Appendix Table A1. Robustness: trimmed precision-weighted interrupted time-series models.**

| **Predictor** | **Fidesz (B (SE))** | **p** | **Opposition (B (SE))** | **p** |
| --- | --- | --- | --- | --- |
| Time trend (t) | -0.007 (0.001) | <.001 | -0.001 (0.001) | .378 |
| COVID level change (post_covid01) | 0.747 (0.859) | .385 | 1.023 (0.766) | .183 |
| Post-COVID slope change (t_covid) | 0.003 (0.002) | .095 | 0.008 (0.002) | <.001 |
| War level change (post_war01) | 0.989 (2.170) | .649 | -5.052 (1.933) | .009 |
| Post-war slope change (t_war) | 0.015 (0.088) | .866 | 0.087 (0.078) | .270 |
| Model statistics | N=285; R²=.632 (Adj. .607) |  | N=285; R²=.550 (Adj. .519) |  |

*Note. Precision-weighted models weight polls by normalized sample size; trimming is applied to limit extreme weights. These models are estimated on the full poll-level series prior to pollster×wave deduplication (see model statistics) as a robustness check; results are substantively consistent with the deduplicated likely-voter series reported in Table 2. All specifications include pollster fixed effects and survey-mode controls.*

**Online Appendix Table A2. Serial-correlation robustness in interrupted time-series models (likely voters, poll-level; N=226).**

| **Predictor** | **Fidesz: AR(1) B (SE) p** | **Fidesz: ARMA(1,1) B (SE) p** | **Opposition: AR(1) B (SE) p** | **Opposition: ARMA(1,1) B (SE) p** |
| --- | --- | --- | --- | --- |
| Time trend (t) | -0.007 (0.002) <.001 | -0.007 (0.002) .006 | -0.002 (0.001) .290 | 0.000 (0.002) .871 |
| COVID level change (post_covid01) | 0.825 (0.927) .374 | 1.279 (1.188) .284 | 0.924 (0.827) .265 | -0.949 (1.062) .373 |
| Post-COVID slope change (t_covid) | 0.004 (0.002) .128 | 0.002 (0.004) .661 | 0.008 (0.002) <.001 | 0.008 (0.003) .024 |
| War level change (post_war01) | 0.753 (2.420) .756 | 1.042 (2.330) .655 | -4.758 (2.175) .030 | -3.570 (2.040) .082 |
| Post-war slope change (t_war) | 0.031 (0.096) .745 | 0.025 (0.093) .786 | 0.077 (0.086) .375 | 0.048 (0.081) .554 |
| Serial correlation parameter (rho) | 0.070 .622 | 0.939 <.001 | 0.152 .346 | 0.942 <.001 |
| Moving-average parameter (phi) | — | 0.424 <.001 | — | 0.465 <.001 |
| AIC (smaller is better) | 1226.075 | 1193.148 | 1169.275 | 1131.757 |

Note. Models are estimated in SPSS MIXED with pollster fixed effects and regression (WLS) weights based on trimmed sample size (REGWGT = n_trim), using the deduplicated pollster×seq time series (N=226). Residual serial correlation is modeled over chronologically ordered polls (seq) within pollster (SUBJECT = pollster_id) using AR(1) or ARMA(1,1) covariance structures and estimated by maximum likelihood to enable AIC comparisons. Coefficients are percentage points; p-values are shown on the second line of each cell; AIC is reported in smaller-is-better form.

## Online Appendix Table A3. Turnout intention and COVID affectedness (Autumn 2021 survey)

**DV:** turnout_top2 (1 = “would definitely/probably vote”, 0 = other)

**Logit coefficients:** B (SE), **odds ratio:** OR = Exp(B)

| **Predictor** | **Model 1 (main effects) B (SE)** | **OR** | **p** | **Model 2 (+ interactions) B (SE)** | **OR** | **p** |
| --- | --- | --- | --- | --- | --- | --- |
| Fidesz voter (Fid_Opp=1; ref: opposition) | 0.662 (0.180) | 1.939 | <.001 | 0.744 (0.189) | 2.105 | <.001 |
| COVID personal impact (index) | 0.019 (0.141) | 1.019 | .895 | 0.077 (0.159) | 1.080 | .628 |
| COVID societal impact (index) | -0.395 (0.123) | 0.674 | .001 | -0.381 (0.123) | 0.683 | .002 |
| Vaccinated (COV2=1) | 0.737 (0.188) | 2.091 | <.001 | 0.516 (0.244) | 1.675 | .035 |
| General health (E1) | -0.777 (0.122) | 0.460 | <.001 | -0.769 (0.122) | 0.464 | <.001 |
| Age | 0.023 (0.006) | 1.023 | <.001 | 0.022 (0.006) | 1.022 | <.001 |
| Male (ref: female) | -0.015 (0.175) | 0.986 | .934 | -0.013 (0.175) | 0.987 | .939 |
| Education (ordinal) | 0.116 (0.092) | 1.123 | .210 | 0.120 (0.092) | 1.127 | .196 |
| Subjective income (ordinal) | 0.044 (0.092) | 1.045 | .633 | 0.044 (0.092) | 1.045 | .631 |
| Settlement type (teltip4; ordinal) | 0.210 (0.083) | 1.233 | .011 | 0.211 (0.083) | 1.234 | .011 |
| COVID personal × Fidesz | — | — | — | -0.168 (0.201) | 0.846 | .404 |
| Vaccinated × Fidesz | — | — | — | 0.547 (0.378) | 1.729 | .147 |
| Constant | 2.588 (0.633) | 13.305 | <.001 | 2.540 (0.680) | 12.675 | <.001 |
| **N (cases used)** | **2844** |  |  | **2844** |  |  |
| **Nagelkerke R²** | **.103** |  |  | **.106** |  |  |
| **Δχ² (interactions block)** |  |  |  | **2.760 (df=2), p=.252** |  |  |

Table note: The table reports binary logistic regression models predicting **turnout intention** in the Autumn 2021 face-to-face survey (N=5,000; models estimated on **N=2,844** complete cases for the variables included). The dependent variable is a **top-two-box indicator** of turnout intention (1 = “certainly would vote” or “probably would vote”; 0 = all other response options). Key predictors include a dichotomous **partisan indicator** (Fidesz voter = 1, opposition voter = 0 [reference]), two additive indices capturing perceived **COVID personal impact** and **COVID societal impact**, a binary **vaccination** indicator, and standard controls (self-rated health, age, gender, education, subjective income, and settlement type). Model 2 adds two interaction terms (COVID personal impact × Fidesz; vaccinated × Fidesz). Entries are **logit coefficients** with standard errors in parentheses; **odds ratios** are reported as Exp(B). Model fit is summarized with -2LL and pseudo-R² measures (Cox & Snell; Nagelkerke). The interaction block does not improve fit relative to the main-effects model (Δχ²(2)=2.760, p=.252), indicating no robust evidence that the COVID–turnout relationship differs by partisan camp in this specification.

**Online Appendix Table A4. Pre-election participation repertoire (negative binomial model)**

**Dependent variable:** qm9_index (count of *participation* acts, 0–8; March 2022 pre-election survey)

| **Predictor** | **B (SE)** | **p** |
| --- | --- | --- |
| Female (ref: male) | -0.143 (0.152) | .347 |
| Age | -0.018 (0.005) | <.001 |
| Education: max 8 grades (ref: tertiary) | 0.203 (0.285) | .477 |
| Education: vocational (ref: tertiary) | 0.326 (0.258) | .206 |
| Education: high school (ref: tertiary) | 0.699 (0.228) | .002 |
| Subj. income: indebted/help (ref: high savings) | -0.468 (0.720) | .516 |
| Subj. income: drawing on savings (ref: high savings) | 0.319 (0.558) | .567 |
| Subj. income: just getting by (ref: high savings) | -0.920 (0.479) | .055 |
| Subj. income: live comfortably, no saving (ref: high savings) | -0.731 (0.477) | .125 |
| Subj. income: small savings possible (ref: high savings) | -0.136 (0.478) | .776 |
| Budapest (ref: village) | 1.141 (0.230) | <.001 |
| County seat (ref: village) | 0.063 (0.278) | .821 |
| Town (ref: village) | 0.785 (0.213) | <.001 |
| **Opposition (ref: Fidesz)** | **0.045 (0.153)** | **.770** |
| Time spent on political information, minutes/day (QM2_1) | 0.009 (0.003) | <.001 |
| Political interest (0–100) | 0.015 (0.003) | <.001 |

**Model statistics** | N = 556; LR χ²(16) = 173.727, p < .001; AIC = 1111.855

**Note.** Negative binomial regression with log link. The dependent variable is the participation repertoire (QM9 index, count of eight non-electoral participation acts, 0–8) measured in the March 2022 pre-election survey. The model includes gender, age, education, subjective household income, settlement type, partisan bloc (Opposition vs. Fidesz), and engagement controls (political interest and time spent on political information). Reference categories are male; tertiary education; highest subjective income (“significant savings possible”); village settlement type; and Fidesz identifiers. Complete-case estimation is used; adding the engagement controls reduces the analytic sample to N=556.

**Online Appendix Table A5. Crisis-related vote motivations by vote bloc
(post-election survey, May 2022).**

| **Panel** | A. Closed-ended (top-2) | A. Closed-ended (top-2) | B. Open-ended (coded) | B. Open-ended (coded) | C. Any-source (closed OR open) | C. Any-source (closed OR open) |
| --- | --- | --- | --- | --- | --- | --- |
| **Measure** | War (war_top2) | COVID-19 (covid_top2) | War (open_war; Review_SZA=1) | COVID-19 (open_covid; Review_SZA=33) | War (war_any) | COVID-19 (covid_any) |
| **Opposition % (n/N)** | 18.2% (45/247) | 0.4% (1/247) | 0.0% (0/247) | 0.0% (0/247) | 18.2% (45/247) | 0.4% (1/247) |
| **Fidesz % (n/N)** | 55.9% (246/440) | 4.8% (21/440) | 13.2% (58/440) | 0.0% (0/440) | 57.3% (252/440) | 4.8% (21/440) |
| **χ²** | 92.041 | 9.736 | 35.561 | — | 98.315 | 9.736 |
| **p** | <.001 | .002 | <.001 | — | <.001 | .002 |
| **OR** | 5.692 | 12.329 | — | — | 6.017 | 12.329 |
| **95% CI (OR)** | 3.916–8.273 | 1.648–92.226 | — | Constant (no mentions) | 4.139–8.748 | 1.648–92.226 |
| **Opposition % (weighted)** | 18.1% (45/249) | 0.4% (1/249) | 0.0% (0/249) | 0.0% (0/249) | 18.1% (45/249) | 0.4% (1/249) |
| **Fidesz % (weighted)** | 56.1% (247/440) | 4.8% (21/440) | 13.2% (58/440) | 0.0% (0/440) | 57.5% (253/440) | 4.8% (21/440) |

Notes: Percentages are **within vote bloc** (“% within vote_fidesz”). Closed-ended top-two motives are based on PE12B1/PE12B2 (war=1; COVID-19=10). Open-ended crisis frames are coded from the post-election justification (Review_SZA; war=1; COVID-19/healthcare=33). “Any-source” indicators equal 1 if the motive appears either in the closed top-two items or the open-ended coding. Weighted results use the survey weight (suly); weighted cell counts may be fractional, and totals may differ slightly due to rounding. Odds ratios compare the odds of citing a given motive among Fidesz vs opposition voters.

Open-ended COVID was a constant (no mentions) in the valid analytic sample, so inferential statistics are not defined for that row

**Online Appendix Table A6. Decision timing, campaign instability, and reallocation proxies by vote bloc (May 2022)**(Percent within vote bloc; weighted by suly.)

| **Measure** | **Opposition % (n/N)** | **Fidesz % (n/N)** | **χ²** | **p** | **OR** | **95% CI (OR)** |
| --- | --- | --- | --- | --- | --- | --- |
| Late decision (election-proximal; PE11_A=1–3) late_decider_election | 12.1% (30/248) | 6.4% (28/438) | 6.656 | .010 | 0.496 | 0.289–0.852 |
| Post-war decision proxy (PE11_A=1–4) post_war_decider | 20.2% (50/248) | 15.8% (69/438) | 2.146 | .143 | 0.740 | 0.495–1.108 |
| Campaign instability (PE11_B=1–4) campaign_changed | 24.5% (61/249) | 23.7% (104/439) | 0.057 | .812 | 0.957 | 0.665–1.376 |
| Considered another list (PE8=Yes) considered_other | 4.9% (12/245) | 13.1% (57/436) | 11.514 | .001 | 2.920 | 1.534–5.558 |
| Split-ticket voting (PE10=Yes) split_ticket | 8.9% (22/246) | 13.1% (57/435) | 2.652 | .103 | 1.535 | 0.914–2.580 |

Late decision uses PE11_A categories 1–3 vs 4–6. Post-war proxy includes category 4 (“one month before”).

Campaign instability uses PE11_B categories 1–4 vs 5.

Considered another list” and split-ticket use PE8/PE10 (98/99 treated as missing).

Weighted counts may be rounded; totals can differ slightly due to rounding.

**Online Appendix Table A7. Alternative list considered among respondents who reported considering another list (PE8=Yes), by vote bloc (weighted).**

Entries show weighted counts and column percentages **within vote bloc** (Opposition vs Fidesz). Because this is a restricted subsample, results should be interpreted descriptively (weighted N=69).

| **Alternative list named (PE9)** | **Opposition (n=12)** | **Fidesz (n=57)** | **Total (N=69)** |
| --- | --- | --- | --- |
| Fidesz–KDNP | 3 (25.0%) | 38 (66.7%) | 41 (59.4%) |
| Joint opposition list | 3 (25.0%) | 7 (12.3%) | 10 (14.5%) |
| Mi Hazánk | 4 (33.3%) | 5 (8.8%) | 9 (13.0%) |
| MKKP | 0 (0.0%) | 2 (3.5%) | 2 (2.9%) |
| Megoldás Mozgalom | 2 (16.7%) | 1 (1.8%) | 3 (4.3%) |
| Don’t know (98) | 0 (0.0%) | 1 (1.8%) | 1 (1.4%) |
| No answer (99) | 0 (0.0%) | 3 (5.3%) | 3 (4.3%) |

**Note:** Table is conditional on PE8=Yes (“considered another list”). Weighted N is small and counts are rounded; the table is intended to document the direction of “latent alternatives” rather than to support inference.

**Online Appendix Table A8. Logistic regression models of war motivation and late deciding (May 2022; weighted).**

Entries are odds ratios (OR) with 95% confidence intervals in brackets. Models are estimated with survey weights (suly). Political interest is measured on a 0–100 scale (higher values = greater interest).

|  | **(A) DV: WAR among top-2 motives (war_top2)** | **(B) DV: Late decider (late_decider_election)** |
| --- | --- | --- |
| **Fidesz voter** (vote_fidesz=1) | **4.77*** [2.88, 7.88] | **0.44** [0.21, 0.96] |
| **WAR top-2 motive** (war_top2) | — | 0.97 [0.51, 1.87] |
| **Political interest (0–100)** | **0.993** [0.987, 0.999] | 1.009 [0.999, 1.021] † |
| Female | 0.91 [0.64, 1.28] | 0.86 [0.49, 1.51] |
| Age | 0.999 [0.988, 1.009] | **0.973*** [0.956, 0.991] |
| Education | 0.99 [0.89, 1.09] | 1.02 [0.86, 1.21] |
| Subjective economic position | **0.60*** [0.48, 0.74] | **0.69** [0.49, 0.96] |
| Settlement type | 0.98 [0.82, 1.17] | 1.10 [0.83, 1.47] |
| Left–right self-placement | 1.06 [0.98, 1.14] | 1.07 [0.95, 1.20] |
| **Model fit (Nagelkerke R²)** | 0.238 | 0.082 |
| **Hosmer–Lemeshow p** | 0.312 | 0.051 |
| **N (valid cases)** | *674* | *672* |

Significance: *** p<.01, ** p<.05, † p<.10.

**Online Appendix Table A9. Additional logistic models: within-opposition late deciding and considered alternatives (May 2022; weighted).**

Entries are odds ratios (OR) with 95% confidence intervals in brackets. Models are estimated with survey weights (suly). Political interest is measured on a 0–100 scale.

|  | **(A) DV: Late decider (late_decider_election), Opposition only (vote_fidesz=0)** | **(B) DV: Considered another list (considered_other), full sample** |
| --- | --- | --- |
| **WAR among top-2 motives** (war_top2) | 1.67 [0.57, 4.90] | — |
| **Fidesz voter** (vote_fidesz=1) | — | **7.34*** [3.05, 17.70] |
| **Political interest (0–100)** | **1.022** [1.004, 1.040] | 0.995 [0.985, 1.006] |
| Female | 0.74 [0.30, 1.79] | 1.08 [0.64, 1.85] |
| Age | 0.99 [0.96, 1.02] | 1.00 [0.98, 1.01] |
| Education | 1.02 [0.79, 1.30] | 1.09 [0.93, 1.27] |
| Subjective economic position | **0.44** [0.26, 0.75] | **1.48** [1.05, 2.07] |
| Settlement type | 1.03 [0.67, 1.60] | **1.36** [1.01, 1.82] |
| Left–right self-placement | **1.44*** [1.21, 1.71] | **0.77*** [0.68, 0.87] |
| **Model fit (Nagelkerke R²)** | 0.274 | 0.126 |
| **2LL** | 146.256 | 389.502 |
| **N** | 246 | 666 |

Significance: *** p<.01, ** p<.05.
